# Supplementary material for: Synthesis and dry-spinning fibers of sulfinyl-based poly(p-phenylene vinylene) (ppv) for semi-conductive textile applications
Source: Royal Society of Chemistry journal article supplement (doi:10.1039/c2jm30186e), 2012-01-01
Supplement: c2jm30186e.pdf [file c2jm30186e.pdf]

Supporting Information

to

**SYNTHESIS AND DRY-SPINNING FIBERS OF SULFINYL-  
BASED POLY(*P*-PHENYLENE VINYLENE) (PPV) FOR SEMI-  
CONDUCTIVE TEXTILE APPLICATIONS**

E. B. Anderson, D. Ingildeev, F. Hermanutz, A. Müller, M. Schweizer, M. R. Buchmeiser\*

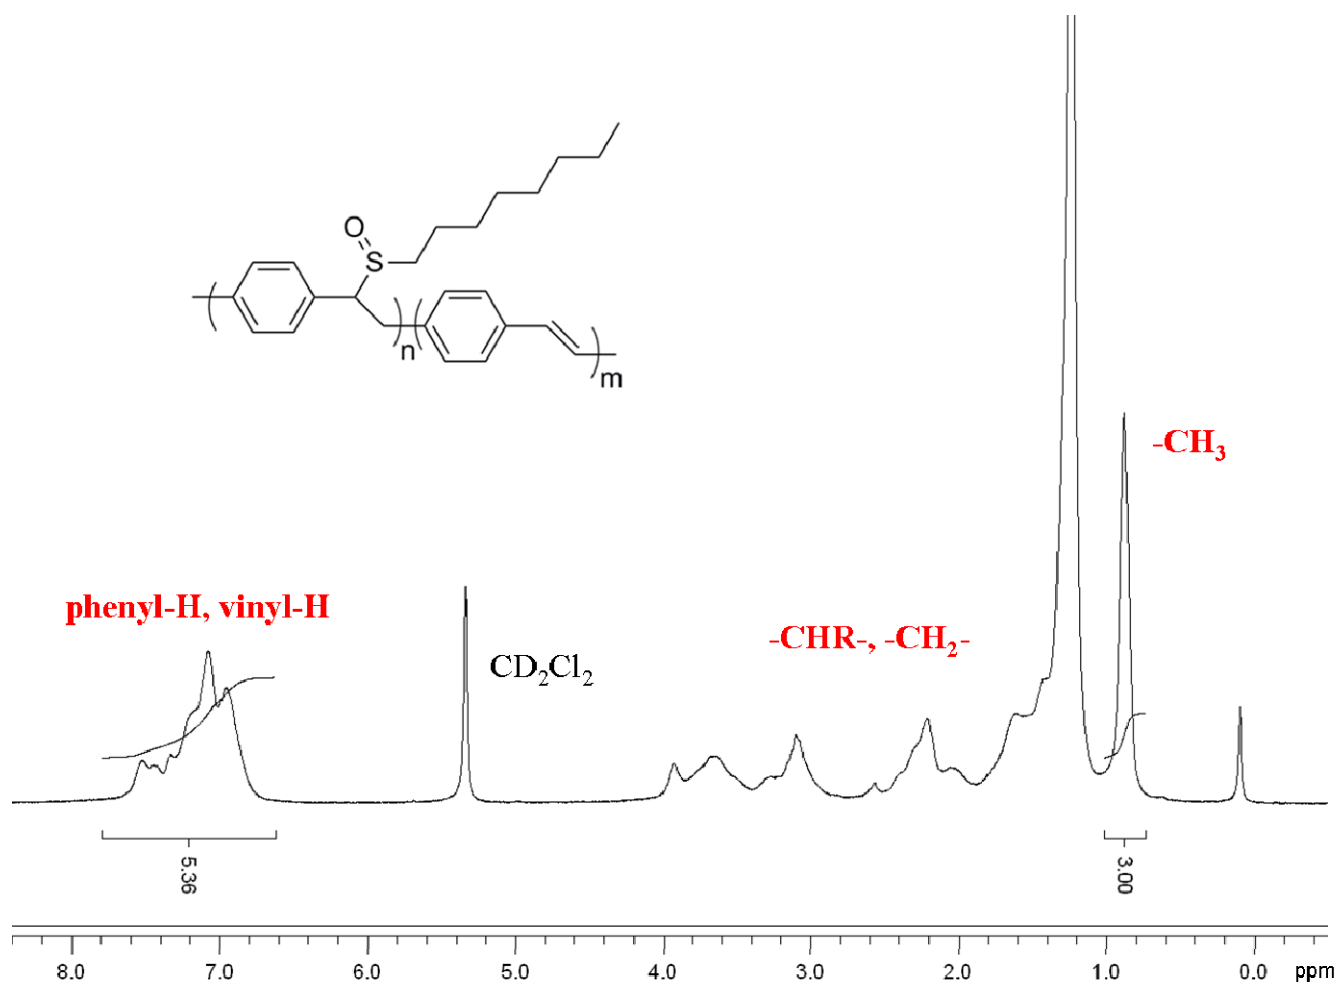

**Figure S1.** <sup>1</sup>H NMR spectrum of sulfinyl-based poly(*p*-phenylene vinylene).
